# Supplementary material for: Spectroscopic Identification of Hydrogen Bond Vibrations and Quasi-Isostructural Polymorphism in N-Salicylideneaniline
Source: MDPI journal article supplement (doi:10.3390/molecules26165043), 2021-08-20
Supplement: s1 [file s1]

## Supplementary material.

### Spectroscopic identification of hydrogen bond vibrations and quasi-isostructural polymorphism in N-salicylideneaniline

Łukasz Hetmańczyk,<sup>1</sup> Eugene A. Goremychkin,<sup>2</sup> Janusz Waliszewski,<sup>3</sup> Mikhail Vener,<sup>4, 5</sup> Paweł Lipkowski,<sup>6</sup> Peter M. Tolstoy<sup>7, \*</sup> and Aleksander Filarowski<sup>2, 8 \*</sup>

Faculty of Chemistry, Jagiellonian University, 2 Gronostajowa str., 30-387 Cracow, Poland;

[lukasz.hetmanczyk@uj.edu.pl](mailto:lukasz.hetmanczyk@uj.edu.pl)

<sup>2</sup> Frank Laboratory of Neutron Physics, Joint Institute for Nuclear Research 6 F. Joliot-Curie str., 141980 Dubna, Russia;

[goremychkin@jinr.ru](mailto:goremychkin@jinr.ru)

<sup>3</sup> Faculty of Physics, University of Białystok, 1L Ciołkowskiego str. 15-245 Białystok, Poland; [j.waliszewski@uwb.edu.pl](mailto:j.waliszewski@uwb.edu.pl)

<sup>4</sup> Quantum Chemistry Department, Mendeleev University of Chemical Technology, Miusskaya Square 9, 125047

Moscow, Russia. [venermv@muctr.ru](mailto:venermv@muctr.ru)

<sup>5</sup> Kurnakov Institute of General and Inorganic Chemistry, Russian Academy of Sciences, Leninskii prosp. 31, 119991

Moscow, Russia. [mikhail.vener@gmail.com](mailto:mikhail.vener@gmail.com)

<sup>6</sup> Department of Physical and Quantum Chemistry, Wrocław University of Science and Technology, Wybrzeże

Wyspiańskiego 27, PL-50370 Wrocław, Poland; [pawel.lipkowski@pwr.edu.pl](mailto:pawel.lipkowski@pwr.edu.pl)

<sup>7</sup> Institute of Chemistry, St. Petersburg State University, Universitetskij pr. 26, 198504 St. Petersburg, Russia;

[peter.tolstoy@spbu.ru](mailto:peter.tolstoy@spbu.ru)

<sup>8</sup> Faculty of Chemistry, University of Wrocław 14 F. Joliot-Curie str., 50-383 Wrocław, Poland;

[aleksander.filarowski@chem.uni.wroc.pl](mailto:aleksander.filarowski@chem.uni.wroc.pl)

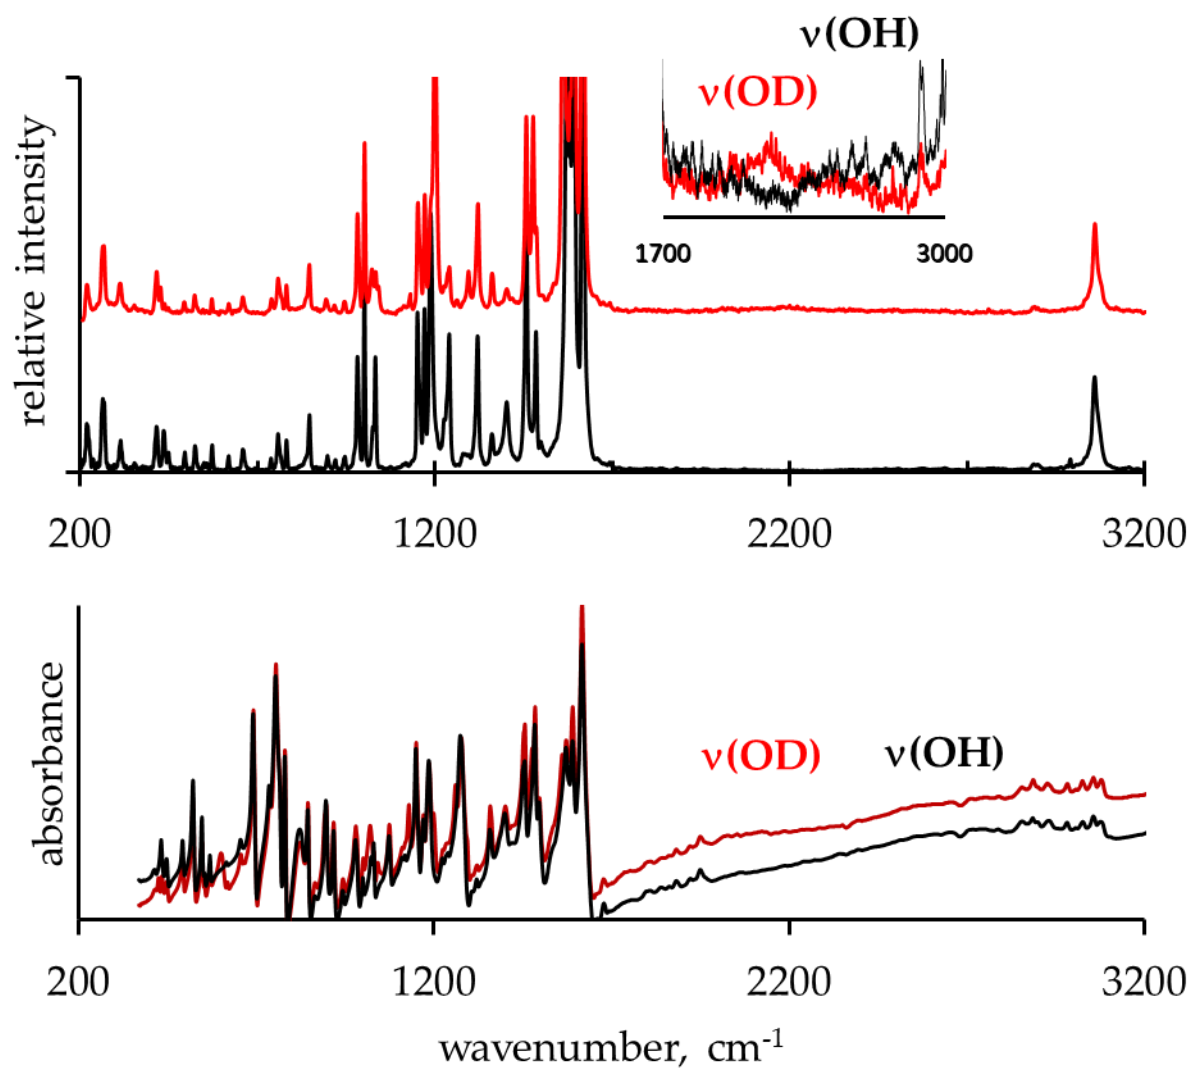

**Figure S1.** Normalized experimental Raman (A) and IR (B) spectra of SA (black trace) and its deuterated derivative SA-OD (red trace).

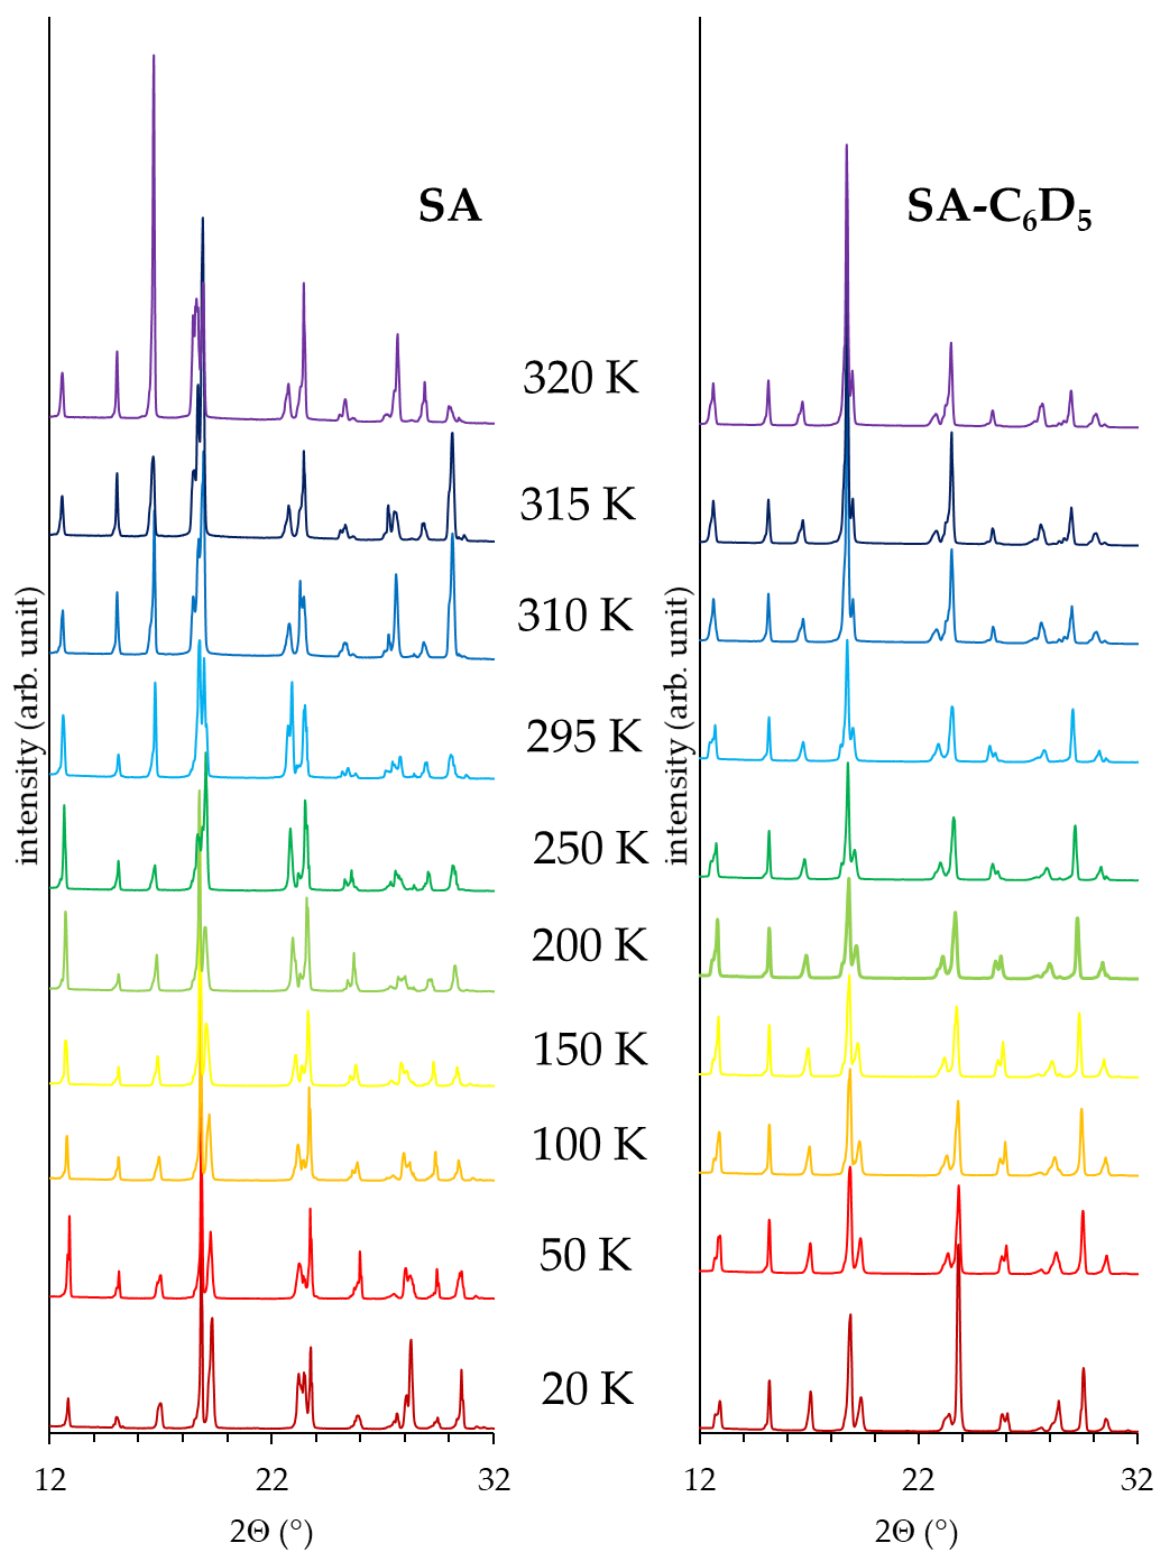

**Figure S2.** Temperature dependence of X-ray powder diffraction patterns of SA and SA-C<sub>6</sub>D<sub>5</sub>.

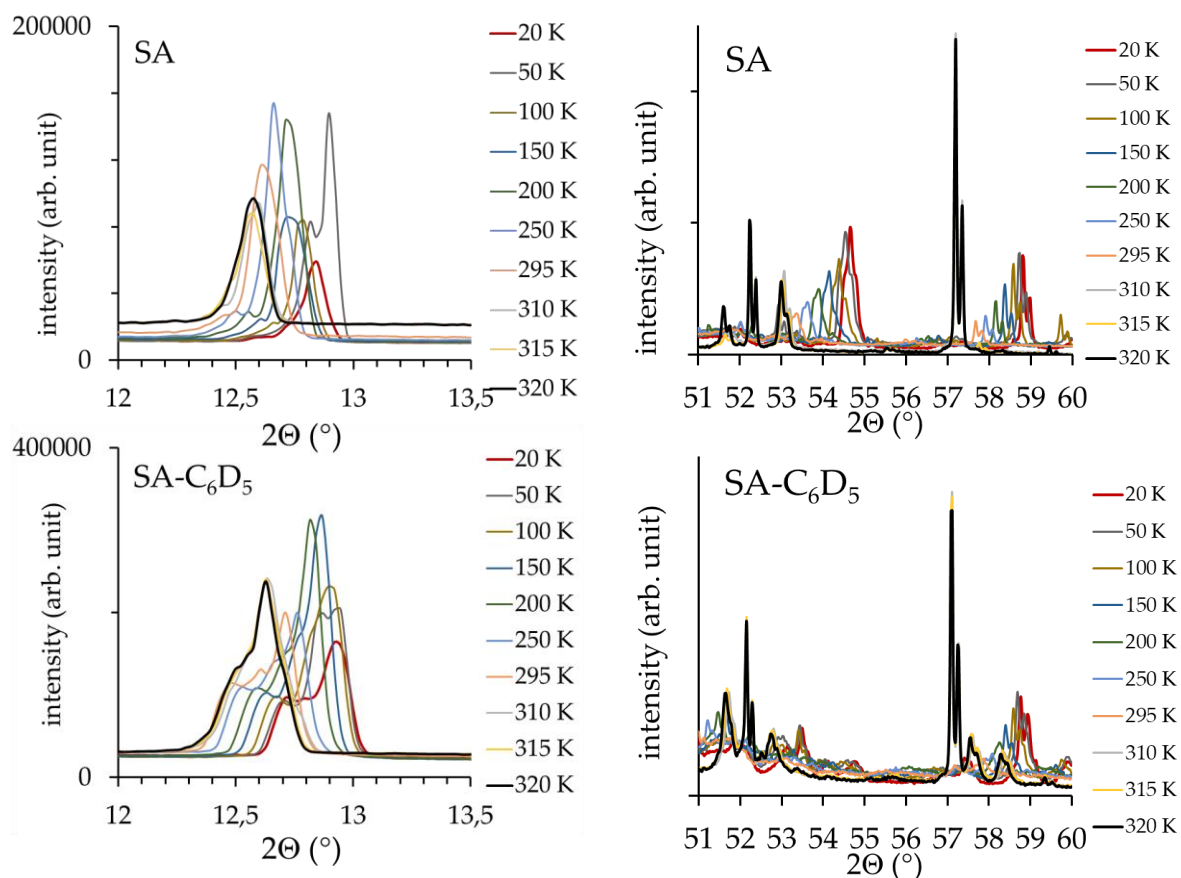

**Figure S3.** Temperature dependence of X-ray powder diffraction patterns of SA and SA-C<sub>6</sub>D<sub>5</sub>.

**Table S1.** Definitions of the internal coordinates used in the potential energy distribution (PED) analysis for the assignments of the vibrational spectra.

---

|                                                                                                                                                                                                                                                                |
|----------------------------------------------------------------------------------------------------------------------------------------------------------------------------------------------------------------------------------------------------------------|
| $\nu(\text{C}_{\text{ar}}\text{H})$ – stretching of the $\text{C}_{\text{aryl}}\text{H}$ bond                                                                                                                                                                  |
| $\nu(\text{C}_{\text{alk}}\text{H})$ – stretching of the $\text{C}_{\text{alkyl}}\text{H}$ bond                                                                                                                                                                |
| $\nu(\text{OH})$ – stretching of the O-H bond                                                                                                                                                                                                                  |
| $\nu(\text{OD})$ – stretching of the O-D bond                                                                                                                                                                                                                  |
| $\nu(\text{CO})$ – stretching of the $\text{C}_{\text{aryl}}\text{O}$ bond                                                                                                                                                                                     |
| $\nu(\text{C}_{\text{ar}}\text{C}_{\text{alk}})$ – stretching of the $\text{C}_{\text{aryl}}\text{C}_{\text{alkyl}}$ bond                                                                                                                                      |
| $\nu(\text{C}_{\text{alk}}\text{C}_{\text{alk}})$ – stretching of the $\text{C}_{\text{alkyl}}\text{C}_{\text{alkyl}}$ bond                                                                                                                                    |
| $\nu(\text{C}=\text{N})$ – stretching of the $\text{C}_{\text{aryl}}=\text{N}$ bond                                                                                                                                                                            |
| $\nu(\text{C}-\text{N})$ – stretching of the $\text{C}_{\text{aryl}}-\text{N}$ bond                                                                                                                                                                            |
| $\alpha(\text{CC})$ – in-plane bending of the $\text{C}_{\text{aryl}}\text{C}_{\text{aryl}}\text{C}_{\text{aryl}}$ chain                                                                                                                                       |
| $\delta(\text{CC}_{\text{alk}})$ – in-plane bending of the $\text{C}(\text{aryl})\text{C}(\text{aryl})\text{C}(\text{alkyl})$ chain                                                                                                                            |
| $\delta(\text{CH})$ – in-plane bending of the $\text{C}(\text{aryl})\text{C}(\text{aryl})\text{H}$ chain                                                                                                                                                       |
| $\delta(\text{OH})$ – in-plane bending of the $\text{C}(\text{aryl})\text{-O-H}$ chain                                                                                                                                                                         |
| $\delta(\text{OD})$ – in-plane bending of the $\text{C}(\text{aryl})\text{-O-D}$ chain                                                                                                                                                                         |
| $\delta(\text{CO})$ – in-plane bending of the $\text{C}(\text{aryl})=\text{C}(\text{aryl})\text{-O}$ chain                                                                                                                                                     |
| $\delta(\text{C}=\text{N})$ – in-plane bending of the $\text{-C}(\text{alkyl})=\text{N}$ unit                                                                                                                                                                  |
| $\delta(\text{C}-\text{N})$ – in-plane bending of the $\text{N-C}(\text{aryl})$ unit                                                                                                                                                                           |
| $\gamma(\text{OH})$ – out-of-plane bending of the O-H bond (the change in angle between the O-H and $\text{C}(\text{aryl})\text{-O}$ bonds)                                                                                                                    |
| $\gamma(\text{OD})$ – out-of-plane bending of the O-D bond (the change in angle between the O-H and $\text{C}(\text{aryl})\text{-O}$ bonds)                                                                                                                    |
| $\gamma(\text{C}-\text{N})$ – out-of-plane bending of the C-N bond (the change in angle between the $\text{C}(\text{aryl})\text{-N}$ and $\text{C}(\text{aryl})=\text{C}(\text{aryl})$ bonds)                                                                  |
| $\gamma(\text{C}=\text{N})$ – out-of-plane bending of the C=N bond (the change in angle between the $\text{C}(\text{alkyl})\text{-N}$ and $\text{C}(\text{aryl})=\text{C}(\text{aryl})$ bonds)                                                                 |
| $\gamma(\text{CC}_{\text{alk}})$ – out-of-plane bending of the $\text{C}(\text{aryl})\text{-C}(\text{alkyl})$ (the change in angle between the $\text{C}(\text{aryl})\text{-C}(\text{alkyl})$ bond and plane defined by three carbon atoms in the phenyl ring) |
| $\gamma(\text{CH})$ – out-of-plane bending of the $\text{C}(\text{aryl})\text{-H}$ (the change in angle between the $\text{C}(\text{aryl})\text{-H}$ bond and plane defined by three carbon atoms in the phenyl ring)                                          |
| $\gamma(\text{CO})$ – out-of-plane bending of the $\text{C}(\text{aryl})\text{-O}$ (the change in angle between the $\text{C}(\text{aryl})\text{-O}$ bond and plane defined by three carbon atoms in the phenyl ring)                                          |
| $\tau(\text{CC})$ – torsion angle in the ring (change in the dihedral angle between two $\text{C}(\text{aryl})=\text{C}(\text{aryl})=\text{C}(\text{aryl})$ planes in the phenyl ring)                                                                         |
| $\tau(\text{CH})$ – torsion around the $\text{C}(\text{alkyl})\text{-C}(\text{alkyl})\text{-H}$ bond                                                                                                                                                           |
| $\tau(\text{CC}_{\text{alk}})$ – torsion angle in the ring (change in the dihedral angle between $\text{C}(\text{aryl})=\text{C}(\text{aryl})=\text{C}(\text{aryl})$ and $\text{C}(\text{aryl})=\text{C}(\text{aryl})\text{-C}(\text{alkyl})$ planes)          |
| $\tau(\text{C}_{\text{alk}}\text{N})$ – torsion angle (change in the dihedral angle between $\text{C}(\text{aryl})\text{-C}(\text{alkyl})\text{-C}(\text{aryl})$ and $\text{C}(\text{aryl})\text{-C}(\text{alkyl})=\text{N}$ planes)                           |
| $\tau(\text{CC}_{\text{alk}})$ – torsion angle (change in the dihedral angle between $\text{C}(\text{aryl})=\text{C}(\text{aryl})=\text{C}(\text{alkyl})$ and $\text{C}(\text{aryl})=\text{C}(\text{aryl})=\text{C}(\text{alkyl})$ planes)                     |
| $\tau(\text{N-C})$ – torsion angle (change in the dihedral angle between $\text{C}(\text{aryl})=\text{C}(\text{aryl})=\text{C}(\text{aryl})$ and $\text{C}(\text{aryl})=\text{C}(\text{aryl})\text{-N}$ planes)                                                |

---

**Table S2.** Experimental IR, Raman, IINS and calculated (B3LYP/6-311+G(d,p)) spectral data of **SA** compound.

| No | IR(SA), cm <sup>-1</sup> | R(SA) cm <sup>-1</sup> | IINS (SA), cm <sup>-1</sup> | DFT, [cm <sup>-1</sup> ] | Int. [km/mol] | Potential energy distribution (%)                                                                                                                                  |
|----|--------------------------|------------------------|-----------------------------|--------------------------|---------------|--------------------------------------------------------------------------------------------------------------------------------------------------------------------|
| 1  | 2600-2000                |                        |                             | 3213.7                   | 512.50        | v(OH) (99)                                                                                                                                                         |
| 2  | 3077                     |                        |                             | 3196.4                   | 7.46          | v(C <sub>ar</sub> H) (97)                                                                                                                                          |
| 3  |                          |                        |                             | 3192.2                   | 16.35         | v(C <sub>ar</sub> H) (95)                                                                                                                                          |
| 4  | 3054                     | 3057                   |                             | 3189.6                   | 14.97         | v(C <sub>ar</sub> H) (94)                                                                                                                                          |
| 5  | 3027                     |                        |                             | 3184.7                   | 21.69         | v(C <sub>ar</sub> H) (100)                                                                                                                                         |
| 6  | 3003sm                   |                        |                             | 3178.3                   | 11.40         | v(C <sub>ar</sub> H) (94)                                                                                                                                          |
| 7  | 2982                     | 2989                   |                             | 3168.3                   | 2.69          | v(C <sub>ar</sub> H) (96)                                                                                                                                          |
| 8  | 2931                     |                        |                             | 3168.2                   | 10.30         | v(C <sub>ar</sub> H) (99)                                                                                                                                          |
| 9  |                          | 2897                   |                             | 3160.7                   | 4.62          | v(C <sub>ar</sub> H) (95)                                                                                                                                          |
| 10 | 2898sm                   | 2891                   |                             | 3155.2                   | 3.49          | v(C <sub>ar</sub> H) (96)                                                                                                                                          |
| 11 | 2884                     |                        |                             | 3030.4                   | 39.15         | v(C <sub>alk</sub> H) (98)                                                                                                                                         |
| 12 | 1616                     | 1614                   |                             | 1666.5                   | 235.41        | v(C=N) (41) δ(CH) (12) δ(CC <sub>alk</sub> ) (7) v(C <sub>ar</sub> C <sub>alk</sub> ) (7)                                                                          |
| 13 | 1590                     | 1590                   |                             | 1662.2                   | 28.96         | v(C <sub>alk</sub> C <sub>alk</sub> ) (42) δ(OH) (11) α(CC) (8) γ(CH) (6) v(C=N) (6)                                                                               |
| 14 |                          | 1580sm                 |                             | 1631.2                   | 110.52        | v(C <sub>alk</sub> C <sub>alk</sub> ) (51) α(CC) (7)                                                                                                               |
| 15 |                          |                        |                             | 1614.3                   | 4.50          | v(C <sub>alk</sub> C <sub>alk</sub> ) (66) γ(CH) (10) α(CC) (9)                                                                                                    |
| 16 | 1571                     | 1571                   |                             | 1607.4                   | 142.08        | v(C <sub>alk</sub> C <sub>alk</sub> ) (32) δ(OH) (13) v(C=N) (12) γ(CH) (9)                                                                                        |
| 17 | 1540                     |                        |                             | 1531.8                   | 37.66         | δ(OH) (16) γ(CH) (24) v(C <sub>alk</sub> C <sub>alk</sub> ) (20)                                                                                                   |
| 18 | 1533sh                   |                        |                             | 1516.6                   | 54.40         | γ(CH) (49) v(C <sub>alk</sub> C <sub>alk</sub> ) (26)                                                                                                              |
| 19 | 1496                     | 1499                   |                             | 1489.8                   | 68.84         | v(C <sub>alk</sub> C <sub>alk</sub> ) (33) v(CO) (10) γ(CH) (23) δ(CC <sub>alk</sub> ) (8) v(C=N) (6)                                                              |
| 20 | 1484                     | 1484                   |                             | 1479.9                   | 3.94          | γ(CH) (48) v(C <sub>alk</sub> C <sub>alk</sub> ) (28)                                                                                                              |
| 21 | 1455                     | 1456                   |                             | 1449.2                   | 39.15         | δ(OH) (35) γ(CH) (28) v(C <sub>alk</sub> C <sub>alk</sub> ) (19) v(C <sub>ar</sub> C <sub>alk</sub> ) (5)                                                          |
| 22 | 1419                     |                        |                             |                          |               |                                                                                                                                                                    |
| 23 | 1400                     | 1400                   |                             | 1405.3                   | 19.68         | δ(CH) (56) v(C=N) (9) v(C <sub>ar</sub> C <sub>alk</sub> ) (5) γ(CH) (5)                                                                                           |
| 24 |                          |                        |                             | 1355.4                   | 0.01          | v(C <sub>alk</sub> C <sub>alk</sub> ) (48) δ(C=N) (6) γ(CH) (12)                                                                                                   |
| 25 | 1358                     | 1359                   |                             | 1351.8                   | 4.70          | γ(CH) (36) v(C <sub>alk</sub> C <sub>alk</sub> ) (26)                                                                                                              |
| 26 | 1320s                    | 1318                   |                             | 1320.1                   | 8.53          | v(C <sub>alk</sub> C <sub>alk</sub> ) (68) γ(CH) (12) v(CO) (5)                                                                                                    |
| 27 | 1306s                    | 1294s                  |                             | 1315.8                   | 63.40         | v(CO) (30) α(CC) (13) γ(CH) (9) v(C <sub>ar</sub> C <sub>alk</sub> ) (6)                                                                                           |
| 28 |                          | 1284s                  |                             |                          |               |                                                                                                                                                                    |
| 29 | 1276                     |                        |                             | 1268.2                   | 5.05          | v(C <sub>alk</sub> C <sub>alk</sub> ) (16) γ(CH) (15) v(CO) (9) δ(CH) (9) v(C-N) (9) v(C <sub>ar</sub> C <sub>alk</sub> ) (9) δ(C=N) (7) δ(CC <sub>alk</sub> ) (6) |
| 30 | 1239                     | 1238                   |                             | 1254.7                   | 14.49         | v(C <sub>alk</sub> C <sub>alk</sub> ) (17) γ(CH) (30) v(C-N) (14) δ(CO) (6)                                                                                        |
| 31 | 1224                     | 1225s                  |                             | 1214.7                   | 74.79         | v(C-N) (15) v(C <sub>ar</sub> C <sub>alk</sub> ) (11) γ(CH) (22) v(C <sub>alk</sub> C <sub>alk</sub> ) (19)                                                        |
| 32 |                          |                        |                             | 1200.7                   | 23.10         | γ(CH) (55) v(C-N) (10)                                                                                                                                             |

|    |      |         |      |        |       |                                                                                                                                                                                            |
|----|------|---------|------|--------|-------|--------------------------------------------------------------------------------------------------------------------------------------------------------------------------------------------|
| 33 | 1186 | 1187    | 1185 | 1189.4 | 0.62  | $\gamma(\text{CH})$ (75) $\nu(\text{C}_{\text{alk}}\text{C}_{\text{alk}})$ (15)                                                                                                            |
| 34 | 1171 | 1169    | 1175 | 1186.1 | 42.45 | $\gamma(\text{CH})$ (61) $\nu(\text{C}_{\text{alk}}\text{C}_{\text{alk}})$ (8)                                                                                                             |
| 35 | 1149 | 1150    | 1153 | 1141.5 | 9.05  | $\gamma(\text{CH})$ (35) $\nu(\text{C}_{\text{alk}}\text{C}_{\text{alk}})$ (24) $\delta(\text{CC}_{\text{alk}})$ (8) $\alpha(\text{CC})$ (8) $\delta(\text{CO})$ (5)                       |
| 36 | 1118 | 1118s   |      |        |       |                                                                                                                                                                                            |
| 37 | 1110 |         | 1089 | 1107.7 | 6.92  | $\nu(\text{C}_{\text{alk}}\text{C}_{\text{alk}})$ (49) $\gamma(\text{CH})$ (37)                                                                                                            |
| 38 | 1074 |         | 1087 | 1053.3 | 6.92  | $\nu(\text{C}_{\text{alk}}\text{C}_{\text{alk}})$ (64) $\gamma(\text{CH})$ (18)                                                                                                            |
| 39 | 1031 | 1032    |      | 1046.7 | 5.87  | $\nu(\text{C}_{\text{alk}}\text{C}_{\text{alk}})$ (53) $\alpha(\text{CC})$ (7) $\gamma(\text{CH})$ (13)                                                                                    |
| 40 | 1023 | 1024s   |      | 1015.1 | 1.32  | $\alpha(\text{CC})$ (50) $\gamma(\text{C}=\text{N})$ (17) $\nu(\text{C}_{\text{alk}}\text{C}_{\text{alk}})$ (11)                                                                           |
| 41 |      |         |      | 1002.9 | 9.51  | $\gamma(\text{C}=\text{N})$ (65) $\alpha(\text{CC})$ (6) $\gamma(\text{CC}_{\text{alk}})$ (6) $\tau(\text{CC}_{\text{alk}})$ (5)                                                           |
| 42 | 1000 | 1000    |      | 998.5  | 0.11  | $\tau(\text{CH})$ (79) $\tau(\text{CC})$ (15)                                                                                                                                              |
| 43 |      | 992v.b. |      | 986.6  | 0.29  | $\tau(\text{CH})$ (80) $\tau(\text{CC})$ (12)                                                                                                                                              |
| 44 | 980  | 980     |      | 980.6  | 0.11  | $\tau(\text{CH})$ (89) $\tau(\text{CC})$ (8)                                                                                                                                               |
| 45 |      |         |      | 952.9  | 1.25  | $\tau(\text{CH})$ (84) $\tau(\text{CC})$ (7)                                                                                                                                               |
| 46 | 943  | 944     |      | 932.7  | 12.95 | $\tau(\text{CH})$ (47) $\delta(\text{C}=\text{N})$ (15) $\alpha(\text{CC})$ (14) $\tau(\text{CC})$ (5)                                                                                     |
| 47 | 918  | 919     | 919  | 910.1  | 19.73 | $\tau(\text{CH})$ (42) $\alpha(\text{CC})$ (19) $\delta(\text{C}=\text{N})$ (16)                                                                                                           |
| 48 | 897  | 895     |      | 872.3  | 2.92  | $\tau(\text{CH})$ (56) $\gamma(\text{OH})$ (12) $\tau(\text{CC})$ (10) $\gamma(\text{CO})$ (8)                                                                                             |
| 49 | 865  |         |      | 860.4  | 12.87 | $\alpha(\text{CC})$ (32) $\nu(\text{C}-\text{N})$ (14) $\delta(\text{C}=\text{N})$ (11) $\nu(\text{C}_{\text{alk}}\text{C}_{\text{alk}})$ (16)                                             |
| 50 |      | 855     |      | 850.8  | 65.09 | $\gamma(\text{OH})$ (66) $\tau(\text{CH})$ (15) $\gamma(\text{CO})$ (6)                                                                                                                    |
| 51 | 846  | 843     |      | 843.4  | 0.66  | $\tau(\text{CH})$ (98)                                                                                                                                                                     |
| 52 | 825  |         |      | 796.8  | 20.78 | $\nu(\text{C}_{\text{alk}}\text{C}_{\text{alk}})$ (27) $\tau(\text{CH})$ (17) $\tau(\text{CC})$ (8) $\nu(\text{CO})$ (8) $\alpha(\text{CC})$ (6)                                           |
| 53 | 781  | 780     | 777  | 771.7  | 38.09 | $\tau(\text{CH})$ (36) $\tau(\text{CC})$ (24) $\nu(\text{C}_{\text{alk}}\text{C}_{\text{alk}})$ (5)                                                                                        |
| 54 | 755  | 755     |      | 763.6  | 63.45 | $\tau(\text{CH})$ (71) $\gamma(\text{CO})$ (15) $\tau(\text{CC})$ (8)                                                                                                                      |
| 55 | 737  | 736     |      | 744.8  | 2.52  | $\tau(\text{CC})$ (49) $\gamma(\text{CC}_{\text{alk}})$ (18) $\gamma(\text{CO})$ (17) $\tau(\text{CH})$ (6)                                                                                |
| 56 | 691  |         |      | 704.9  | 36.06 | $\tau(\text{CC})$ (60) $\tau(\text{CH})$ (36)                                                                                                                                              |
| 57 | 657  | 657     | 658  | 672.2  | 5.49  | $\alpha(\text{CC})$ (51) $\delta(\text{C}=\text{N})$ (23)                                                                                                                                  |
| 58 | 617s | 615     | 625  | 631.9  | 0.02  | $\alpha(\text{CC})$ (84)                                                                                                                                                                   |
| 59 | 571  | 570     |      | 583.8  | 5.29  | $\alpha(\text{CC})$ (63) $\delta(\text{CC}_{\text{alk}})$ (9)                                                                                                                              |
| 60 | 555w | 554s    | 557  | 563.0  | 1.93  | $\tau(\text{CC})$ (54) $\gamma(\text{CO})$ (9) $\gamma(\text{CC}_{\text{alk}})$ (8) $\tau(\text{CH})$ (5)                                                                                  |
| 61 | 548  | 551s    |      | 556.2  | 11.77 | $\delta(\text{CC}_{\text{alk}})$ (19) $\alpha(\text{CC})$ (20) $\delta(\text{CO})$ (9)                                                                                                     |
| 62 | 523  | 522     | 538  | 533.9  | 14.79 | $\tau(\text{CC})$ (30) $\tau(\text{CH})$ (22) $\alpha(\text{CC})$ (14) $\gamma(\text{CO})$ (8.)                                                                                            |
| 63 | 494  | 493     | 497  | 501.4  | 2.54  | $\delta(\text{C}-\text{N})$ (16) $\tau(\text{CC})$ (12) $\gamma(\text{CO})$ (12) $\gamma(\text{CC}_{\text{alk}})$ (9) $\delta(\text{CC}_{\text{alk}})$ (8) $\delta(\text{C}=\text{N})$ (6) |
| 64 |      |         |      | 460.4  | 3.16  | $\delta(\text{CO})$ (25) $\gamma(\text{CC}_{\text{alk}})$ (17) $\tau(\text{CC})$ (28) $\alpha(\text{CC})$ (6)                                                                              |
| 65 | 449  | 446     | 445  | 447.4  | 3.83  | $\tau(\text{CC})$ (31) $\gamma(\text{CC}_{\text{alk}})$ (20) $\delta(\text{CO})$ (16) $\delta(\text{C}=\text{N})$ (7)                                                                      |
| 66 | 434  | 434     |      |        |       |                                                                                                                                                                                            |

|    |      |     |       |      |                                                                                                                                                                                                                 |
|----|------|-----|-------|------|-----------------------------------------------------------------------------------------------------------------------------------------------------------------------------------------------------------------|
| 67 | 416  | 416 | 420.6 | 0.93 | $\tau(\text{CC})$ (82)                                                                                                                                                                                          |
| 68 | 353  | 359 | 347.3 | 0.68 | $\tau(\text{CC})$ (49) $\delta(\text{CC}_{\text{alk}})$ (13) $\delta(\text{C-N})$ (5)                                                                                                                           |
| 69 | 311  | 312 | 318.5 | 3.58 | $\tau(\text{CC}_{\text{alk}})$ (23) $\gamma(\text{CC}_{\text{alk}})$ (12) $\delta(\text{C-N})$ (10) $\delta(\text{CC}_{\text{alk}})$ (9) $\gamma(\text{CO})$ (7) $\gamma(\text{OH})$ (7) $\tau(\text{N-C})$ (7) |
| 74 | 261  | 264 | 264.6 | 0.94 | $\tau(\text{CC})$ (31) $\tau(\text{CC}_{\text{alk}})$ (7) $\delta(\text{CC}_{\text{alk}})$ (7) $\alpha(\text{CC})$ (7) $\nu(\text{CarC}_{\text{alk}})$ (6)                                                      |
| 75 | 222  | 217 | 222   | 1.31 | $\tau(\text{CC})$ (45) $\tau(\text{CC}_{\text{alk}})$ (21) $\tau(\text{C}_{\text{alk}}\text{N})$ (8) $\gamma(\text{CC}_{\text{alk}})$ (7) $\tau(\text{N-C})$ (7)                                                |
| 76 |      | 208 |       |      |                                                                                                                                                                                                                 |
| 77 | 202  | 165 | 199.2 | 1.48 | $\delta(\text{CC}_{\text{alk}})$ (16) $\delta(\text{C=N})$ (15) $\tau(\text{CC})$ (26) $\delta(\text{C-N})$ (6) $\tau(\text{C}_{\text{alk}}\text{N})$ (5)                                                       |
| 78 | 158  | 124 | 147.0 | 0.34 | $\gamma(\text{OH})$ (24) $\tau(\text{CC})$ (17)- $\tau(\text{C}_{\text{alk}}\text{N})$ (14) $\gamma(\text{CC}_{\text{alk}})$ (8) $\tau(\text{N-C})$ (6) $\tau(\text{CC}_{\text{alk}})$ (5)                      |
| 79 | 106  | 88  | 76.6  | 0.15 | $\delta(\text{C=N})$ (34) $\tau(\text{CC}_{\text{alk}})$ (10) $\delta(\text{CC}_{\text{alk}})$ (10) $\tau(\text{CH})$ (8) $\delta(\text{C-N})$ (7) $\gamma(\text{OH})$ (6) $\tau(\text{CC})$ (5)                |
| 80 | 59.3 | 51  | 55.9  | 0.17 | $\gamma(\text{CC}_{\text{alk}})$ (41) $\tau(\text{C}_{\text{alk}}\text{N})$ (14) $\gamma(\text{OH})$ (10) $\gamma(\text{C=N})$ (10) $\tau(\text{CH})$ (8)                                                       |
| 81 |      | 39  | 41.0  | 0.54 | $\tau(\text{N-C})$ (57) $\tau(\text{CC}_{\text{alk}})$ (19) $\delta(\text{C-N})$ (10)                                                                                                                           |

---

$\nu$  - stretching vibration;  $\delta$  - scissoring vibration;  $\rho$  - rocking;  $\omega$  - wagging;  $\gamma$  - out-of-plane;  $\tau$  - twisting and torsional vibration; sh - shoulder and s - small intensity.



**Table S3.** Experimental IR, Raman and calculated (B3LYP/6-311+G(d,p)) spectral data of deuterated derivative **SA-OD**.

| IR(SA-OD), cm <sup>-1</sup> | R(SA-OD), cm <sup>-1</sup> | DFT, cm <sup>-1</sup> | Int. [km/mol] | Potential energy distribution (%)                                                     |
|-----------------------------|----------------------------|-----------------------|---------------|---------------------------------------------------------------------------------------|
| 1                           |                            | 3196.4                | 10.79         | v(CarH) (97)                                                                          |
| 2                           |                            | 3192.2                | 13.84         | v(CarH) (95)                                                                          |
| 3                           |                            | 3189.6                | 13.72         | v(CarH) (95)                                                                          |
| 4 3079                      |                            | 3184.8                | 17.41         | v(CarH) (100)                                                                         |
| 5 3055                      | 3059                       | 3178.3                | 11.10         | v(CarH) (95)                                                                          |
| 6 3023                      |                            | 3168.3                | 2.05          | v(CarH) (90)                                                                          |
| 7 3004                      |                            | 3168.3                | 6.40          | v(CarH) (95)                                                                          |
| 8 2981                      |                            | 3160.7                | 3.74          | v(CarH) (95)                                                                          |
| 9 2927                      |                            | 3155.3                | 4.89          | v(CarH) (96)                                                                          |
| 10 2884                     |                            | 3030.9                | 29.06         | v(CalkH) (98)                                                                         |
| 11 2400-1700                |                            | 2344.4                | 296.94        | v(OD) (99)                                                                            |
| 12 1677                     |                            | 1666.2                | 229.88        | v(C=N) (41) δ(CH) (12) δ(CCalk) (7) v(CarCalk) (7)                                    |
| 13 1616                     | 1616                       | 1651.5                | 17.05         | v(CalkCalk) (57) α(CC) (9) v(C=N) (8) γ(CH) (8)                                       |
| 14 1590                     | 1590                       | 1629.9                | 121.47        | v(CalkCalk) (51) α(CC) (8) v(C=N) (6) γ(CH) (10)                                      |
| 15 1571                     | 1580sh                     | 1614.3                | 4.20          | v(CalkCalk) (65) γ(CH) (10) α(CC) (9)                                                 |
| 16 1560                     | 1561                       | 1588.5                | 125.59        | v(CalkCalk) (51) γ(CH) (12) v(C=N) (7) α(CC) (6)                                      |
| 17 1532sh                   |                            | 1521.0                | 31.82         | γ(CH) (52) v(CalkCalk) (31) v(C-N) (6)                                                |
| 18 1496                     |                            | 1504.2                | 74.47         | γ(CH) (41) v(CalkCalk) (27) v(CarCalk) (8)                                            |
| 19 1484                     | 1484                       | 1486.4                | 44.32         | γ(CH) (27) v(CalkCalk) (20) v(CO) (8) δ(CCalk) (7) v(C=N) (6)                         |
| 20 1475sm                   | 1476                       | 1479.6                | 4.21          | γ(CH) (43) v(CalkCalk) (25)                                                           |
| 21 1455                     | 1456                       |                       |               |                                                                                       |
| 22 1436sh                   |                            |                       |               |                                                                                       |
| 23 1419sm                   |                            |                       |               |                                                                                       |
| 24 1400                     | 1402                       | 1405.4                | 17.35         | δ(CH) (56) v(C=N) (9) v(CarCalk) (6)                                                  |
| 25 1385sh                   |                            | 1360.1                | 2.50          | v(CalkCalk) (72)                                                                      |
| 26 1358                     | 1360                       | 1352.3                | 4.72          | γ(CH) (53) v(CalkCalk) (28)                                                           |
| 27 1321                     | 1320                       | 1323.2                | 27.15         | v(CO) (18) γ(CH) (34) α(CC) (6)                                                       |
| 28 1306sm                   |                            | 1319.9                | 13.41         | v(CalkCalk) (65) v(CO) (8) γ(CH) (12)                                                 |
| 29 1294sh                   | 1294                       |                       |               |                                                                                       |
| 30 1276                     |                            | 1290.7                | 16.09         | γ(CH) (21) v(CO) (15) δ(C=N) (11) δ(CCalk) (10) δ(COD) (9) v(CalkCalk) (9) α(CC) (8.) |
| 31 1260                     | 1262ws                     | 1264.3                | 6.77          | v(C=N) (18) v(CarCalk) (18) δ(CH) (10) v(CalkCalk) (17) γ(CH) (5)                     |
| 32 1235                     | 1239                       |                       |               |                                                                                       |

|           |        |        |       |                                                                                                                                                                                            |
|-----------|--------|--------|-------|--------------------------------------------------------------------------------------------------------------------------------------------------------------------------------------------|
| 33 1224sm |        | 1222.9 | 92.57 | $\nu(\text{C}=\text{N})$ (23) $\nu(\text{C}_{\text{ar}}\text{C}_{\text{alk}})$ (11) $\nu(\text{C}_{\text{alk}}\text{C}_{\text{alk}})$ (9) $\alpha(\text{CC})$ (7) $\gamma(\text{CH})$ (11) |
| 34 1198sm | 1199   | 1202.1 | 11.10 | $\gamma(\text{CH})$ (67) $\nu(\text{C}=\text{N})$ (6) $\nu(\text{C}_{\text{alk}}\text{C}_{\text{alk}})$ (6)                                                                                |
| 35 1186   | 1187sh | 1189.5 | 0.74  | $\gamma(\text{CH})$ (77) $\nu(\text{C}_{\text{alk}}\text{C}_{\text{alk}})$ (16)                                                                                                            |
| 36 1170   | 1171   | 1186.8 | 26.94 | $\gamma(\text{CH})$ (74) $\nu(\text{C}_{\text{alk}}\text{C}_{\text{alk}})$ (13)                                                                                                            |
| 37 1150   | 1151   | 1158.5 | 31.85 | $\gamma(\text{CH})$ (46) $\nu(\text{C}_{\text{alk}}\text{C}_{\text{alk}})$ (24) $\delta(\text{COD})$ (10) $\delta(\text{CC}_{\text{alk}})$ (5)                                             |
| 38 1129   | 1132ws |        |       | $\delta(\text{COD})$                                                                                                                                                                       |
| 39 1119sh |        |        |       |                                                                                                                                                                                            |
| 40 1111sm |        | 1107.7 | 7.73  | $\nu(\text{C}_{\text{alk}}\text{C}_{\text{alk}})$ (49) $\gamma(\text{CH})$ (37)                                                                                                            |
| 41 1094sh |        |        |       |                                                                                                                                                                                            |
| 42 1074   |        |        |       |                                                                                                                                                                                            |
| 43        |        | 1065.8 | 10.01 | $\delta(\text{COD})$ (35) $\nu(\text{C}_{\text{alk}}\text{C}_{\text{alk}})$ (33) $\gamma(\text{CH})$ (8)                                                                                   |
| 44 1041   | 1040w  | 1047.5 | 8.56  | $\nu(\text{C}_{\text{alk}}\text{C}_{\text{alk}})$ (50) $\gamma(\text{CH})$ (13)                                                                                                            |
| 45 1031sm | 1032   | 1041.2 | 25.94 | $\delta(\text{COD})$ (33) $\nu(\text{C}_{\text{alk}}\text{C}_{\text{alk}})$ (33) $\alpha(\text{CC})$ (8)                                                                                   |
| 46 1020   | 1020   | 1015.1 | 1.14  | $\alpha(\text{CC})$ (50) $\gamma(\text{C}=\text{N})$ (17) $\nu(\text{C}_{\text{alk}}\text{C}_{\text{alk}})$ (12)                                                                           |
| 47 1001   | 1001   | 1002.8 | 8.59  | $\gamma(\text{C}=\text{N})$ (65) $\alpha(\text{CC})$ (6) $\gamma(\text{CC}_{\text{alk}})$ (6) $\tau(\text{CC}_{\text{alk}})$ (5.)                                                          |
| 48        |        | 998.5  | 0.10  | $\tau(\text{CH})$ (79) $\tau(\text{CC})$ (15)                                                                                                                                              |
| 49 979    |        | 986.6  | 0.32  | $\tau(\text{CH})$ (80) $\tau(\text{CC})$ (12)                                                                                                                                              |
| 50        | 981    | 980.6  | 0.11  | $\tau(\text{CH})$ (89) $\tau(\text{CC})$ (8)                                                                                                                                               |
| 51 965sh  |        |        |       |                                                                                                                                                                                            |
| 52 943    | 943w   | 952.8  | 1.53  | $\tau(\text{CH})$ (84) $\tau(\text{CC})$ (7)                                                                                                                                               |
| 53        |        | 930.6  | 11.76 | $\tau(\text{CH})$ (58) $\delta(\text{C}=\text{N})$ (11) $\alpha(\text{CC})$ (8) $\tau(\text{CC})$ (6)                                                                                      |
| 54 917    | 916w   | 905.0  | 20.77 | $\delta(\text{C}=\text{N})$ (21) $\alpha(\text{CC})$ (21) $\tau(\text{CH})$ (33)                                                                                                           |
| 55 896    | 892w   |        |       |                                                                                                                                                                                            |
| 56        |        | 868.3  | 3.52  | $\tau(\text{CH})$ (66) $\tau(\text{CC})$ (12) $\gamma(\text{CO})$ (11) $\gamma(\text{CC}_{\text{alk}})$ (5)                                                                                |
| 57 865    |        | 859.9  | 12.22 | $\alpha(\text{CC})$ (32) $\nu(\text{C}_{\text{alk}}\text{C}_{\text{alk}})$ (16) $\nu(\text{C}-\text{N})$ (14) $\delta(\text{C}=\text{N})$ (10)                                             |
| 58 845    | 845w   | 843.3  | 0.86  | $\tau(\text{CH})$ (99)                                                                                                                                                                     |
| 59 823    |        |        |       |                                                                                                                                                                                            |
| 60 780    | 779w   | 795.8  | 19.91 | $\nu(\text{C}_{\text{alk}}\text{C}_{\text{alk}})$ (26) $\tau(\text{CH})$ (17) $\tau(\text{CC})$ (8) $\nu(\text{CO})$ (8) $\alpha(\text{CC})$ (6)                                           |
| 61 767sh  |        | 771.5  | 39.14 | $\tau(\text{CC})$ (24) $\tau(\text{CH})$ (36) $\nu(\text{C}_{\text{alk}}\text{C}_{\text{alk}})$ (5)                                                                                        |
| 62 755    | 759w   | 763.7  | 57.20 | $\tau(\text{CH})$ (74) $\gamma(\text{CO})$ (14) $\tau(\text{CC})$ (7)                                                                                                                      |
| 63        |        | 746.1  | 4.02  | $\tau(\text{CC})$ (48) $\gamma(\text{CC}_{\text{alk}})$ (18) $\gamma(\text{CO})$ (18) $\tau(\text{CH})$ (5)                                                                                |
| 64 737    | 739w   |        |       |                                                                                                                                                                                            |
| 65 720sh  |        |        |       |                                                                                                                                                                                            |
| 66 692    |        | 704.9  | 37.42 | $\tau(\text{CC})$ (60.) $\tau(\text{CH})$ (36)                                                                                                                                             |

|          |      |       |       |                                                                                                                                                                                                                                |
|----------|------|-------|-------|--------------------------------------------------------------------------------------------------------------------------------------------------------------------------------------------------------------------------------|
| 67 669sh |      | 671.7 | 5.86  | $\alpha(\text{CC})$ (52) $\delta(\text{C}=\text{N})$ (24)                                                                                                                                                                      |
| 68 656   |      |       |       |                                                                                                                                                                                                                                |
| 69       | 657w |       |       |                                                                                                                                                                                                                                |
| 70       |      | 632.7 | 3.14  | $\alpha(\text{CC})$ (75) $\gamma(\text{COD})$ (8)                                                                                                                                                                              |
| 71 618sm | 618w | 624.5 | 30.70 | $\gamma(\text{COD})$ (79) $\alpha(\text{CC})$ (8) $\tau(\text{CC})$ (5)                                                                                                                                                        |
| 72 601   |      |       |       |                                                                                                                                                                                                                                |
| 73       |      | 581.9 | 5.90  | $\alpha(\text{CC})$ (68) $\delta(\text{CC}_{\text{alk}})$ (7)                                                                                                                                                                  |
| 74 570   | 570w |       |       |                                                                                                                                                                                                                                |
| 75       |      | 561.8 | 1.91  | $\tau(\text{CC})$ (32) $\alpha(\text{CC})$ (22) $\gamma(\text{CC}_{\text{alk}})$ (8) $\gamma(\text{CO})$ (8) $\tau(\text{CH})$ (5)                                                                                             |
| 76       |      | 553.2 | 12.22 | $\delta(\text{CC}_{\text{alk}})$ (20) $\alpha(\text{CC})$ (16) $\delta(\text{CO})$ (6) $\tau(\text{CC})$ (6) $\delta(\text{C}=\text{N})$ (5) $\tau(\text{CH})$ (5)                                                             |
| 77 554sm |      |       |       |                                                                                                                                                                                                                                |
| 78 547   |      | 531.9 | 16.78 | $\tau(\text{CC})$ (22) $\tau(\text{CH})$ (15) $\alpha(\text{CC})$ (23) $\gamma(\text{CO})$ (7)                                                                                                                                 |
| 79 522   | 520w |       |       |                                                                                                                                                                                                                                |
| 80 491   | 493w | 499.2 | 4.91  | $\delta(\text{C}-\text{N})$ (15) $\tau(\text{CC})$ (14) $\gamma(\text{CO})$ (13.) $\gamma(\text{CC}_{\text{alk}})$ (9) $\delta(\text{CC}_{\text{alk}})$ (7) $\delta(\text{C}=\text{N})$ (5)                                    |
| 81 479sh |      |       |       |                                                                                                                                                                                                                                |
| 82 448   |      | 455.9 | 2.40  | $\gamma(\text{CC}_{\text{alk}})$ (26) $\tau(\text{CC})$ (43) $\delta(\text{CO})$ (6) $\tau(\text{CH})$ (5) $\gamma(\text{CO})$ (5)                                                                                             |
| 83 434   |      | 436.4 | 4.28  | $\delta(\text{CO})$ (43) $\tau(\text{CC})$ (11) $\delta(\text{C}=\text{N})$ (11) $\gamma(\text{CC}_{\text{alk}})$ (8)                                                                                                          |
| 84 425   | 426w | 420.4 | 0.90  | $\tau(\text{CC})$ (81)                                                                                                                                                                                                         |
| 85 415sm | 414w |       |       |                                                                                                                                                                                                                                |
| 86       | 348w | 345.8 | 0.92  | $\tau(\text{CC})$ (50) $\delta(\text{CC}_{\text{alk}})$ (12)                                                                                                                                                                   |
| 87       | 310w | 317.5 | 3.15  | $\tau(\text{CC}_{\text{alk}})$ (23) $\gamma(\text{CC}_{\text{alk}})$ (12) $\delta(\text{C}-\text{N})$ (10) $\delta(\text{CC}_{\text{alk}})$ (10) $\gamma(\text{OH})$ (8) $\gamma(\text{CO})$ (7) $\tau(\text{N}-\text{C})$ (7) |
| 88       | 266w | 264.2 | 0.89  | $\tau(\text{CC})$ (31) $\delta(\text{CC}_{\text{alk}})$ (7) $\tau(\text{CC}_{\text{alk}})$ (7) $\alpha(\text{CC})$ (7) $\nu(\text{CarCC}_{\text{alk}})$ (7)                                                                    |
| 89       | 217w | 217.3 | 1.13  | $\tau(\text{CC})$ (44) $\tau(\text{CC}_{\text{alk}})$ (22) $\tau(\text{C}_{\text{alk}}\text{N})$ (8) $\gamma(\text{CC}_{\text{alk}})$ (7) $\tau(\text{N}-\text{C})$ (7)                                                        |
| 90       |      | 197.6 | 1.49  | $\delta(\text{CC}_{\text{alk}})$ (16) $\delta(\text{C}=\text{N})$ (15) $\tau(\text{CC})$ (26) $\delta(\text{C}-\text{N})$ (6) $\tau(\text{C}_{\text{alk}}\text{N})$ (5)                                                        |
| 91       |      | 146.8 | 0.35  | $\gamma(\text{OH})$ (23) $\tau(\text{CC})$ (17) $\tau(\text{C}_{\text{alk}}\text{N})$ (14) $\gamma(\text{CC}_{\text{alk}})$ (8) $\tau(\text{N}-\text{C})$ (6) $\tau(\text{CC}_{\text{alk}})$ (5)                               |
| 92       |      | 76.3  | 0.15  | $\delta(\text{C}=\text{N})$ (34) $\tau(\text{CC}_{\text{alk}})$ (10) $\delta(\text{CC}_{\text{alk}})$ (10) $\tau(\text{CH})$ (8) $\delta(\text{C}-\text{N})$ (6) $\gamma(\text{COD})$ (6) $\tau(\text{CC})$ (5)                |
| 93       |      | 55.8  | 0.16  | $\gamma(\text{CC}_{\text{alk}})$ (41) $\tau(\text{C}_{\text{alk}}\text{N})$ (14.) $\gamma(\text{OH})$ (10) $\gamma(\text{C}=\text{N})$ (10) $\tau(\text{CH})$ (8)                                                              |
| 94       |      | 40.9  | 0.53  | $\tau(\text{N}-\text{C})$ (57) $\tau(\text{CC}_{\text{alk}})$ (19) $\delta(\text{C}-\text{N})$ (10)                                                                                                                            |

**Table S4.** Experimental IINS and calculated (B3LYP/6-311+G(d,p)) spectral data of deuterated **SA-C<sub>6</sub>D<sub>5</sub>** derivative for 0 – 1200 region.

|    | IINS ( <b>SA-C<sub>6</sub>D<sub>5</sub></b> ),<br>cm <sup>-1</sup> | DFT, cm <sup>-1</sup> | Int. [km/mol] | Potential energy distribution (%)                                                                                                                                                 |
|----|--------------------------------------------------------------------|-----------------------|---------------|-----------------------------------------------------------------------------------------------------------------------------------------------------------------------------------|
| 1  | 1163                                                               | 1186.68               | 16.90         | $\gamma(\text{CH})$ (76) $\nu(\text{C}_{\text{alk}}\text{C}_{\text{alk}})$ (8)                                                                                                    |
| 2  | -                                                                  | 1175.85               | 92.67         | $\nu(\text{C-N})$ (35) $\alpha(\text{CC})$ (13) $\nu(\text{C}_{\text{alk}}\text{C}_{\text{alk}})$ (5)                                                                             |
| 3  | -                                                                  | 1141.11               | 6.87          | $\nu(\text{C}_{\text{alk}}\text{C}_{\text{alk}})$ (28) $\gamma(\text{CH})$ (37) $\alpha(\text{CC})$ (8) $\delta_{\text{alk}}(\text{CC}_{\text{alk}})$ (6) $\delta(\text{CO})$ (5) |
| 4  | -                                                                  | 1056.88               | 1.44          | $\gamma(\text{CD})$ (80) $\delta(\text{C-N})$ (6) $\nu(\text{C}_{\text{alk}}\text{C}_{\text{alk}})$ (5)                                                                           |
| 5  | -                                                                  | 1052.34               | 4.55          | $\nu(\text{C}_{\text{alk}}\text{C}_{\text{alk}})$ (59) $\gamma(\text{CH})$ (15)                                                                                                   |
| 6  | -                                                                  | 1005.52               | 10.40         | $\gamma(\text{C=N})$ (70) $\tau(\text{CC=N})$ (9) $\tau(\text{CH})$ (6) $\gamma(\text{CC}_{\text{alk}})$ (5)                                                                      |
| 7  | 990                                                                | 986.59                | 0.27          | $\tau(\text{CH})$ (80) $\tau(\text{CC})$ (12)                                                                                                                                     |
| 8  | -                                                                  | 970.17                | 1.06          | $\alpha(\text{CC})$ (58) $\nu(\text{C}_{\text{alk}}\text{C}_{\text{alk}})$ (36)                                                                                                   |
| 9  | -                                                                  | 952.68                | 0.95          | $\tau(\text{CH})$ (86) $\tau(\text{CC})$ (7)                                                                                                                                      |
| 10 | -                                                                  | 920.04                | 19.85         | $\alpha(\text{CC})$ (39) $\delta(\text{C=N})$ (20)                                                                                                                                |
| 11 | -                                                                  | 889.64                | 0.94          | $\gamma(\text{CD})$ (46) $\nu(\text{C}_{\text{alk}}\text{C}_{\text{alk}})$ (18) $\alpha(\text{CC})$ (14)                                                                          |
| 12 | -                                                                  | 872.69                | 3.77          | $\tau(\text{CH})$ (56) $\gamma(\text{OH})$ (12) $\tau(\text{CC})$ (10) $\gamma(\text{CO})$ (8)                                                                                    |
| 13 | -                                                                  | 863.05                | 2.13          | $\gamma(\text{CD})$ (54) $\alpha(\text{CC})$ (13) $\nu(\text{C}_{\text{alk}}\text{C}_{\text{alk}})$ (13) $\nu(\text{C-N})$ (5)                                                    |
| 14 | -                                                                  | 860.53                | 1.48          | $\gamma(\text{CD})$ (81) $\nu(\text{C}_{\text{alk}}\text{C}_{\text{alk}})$ (6)                                                                                                    |
| 15 | 855                                                                | 851.37                | 57.58         | $\gamma(\text{OH})$ (63) $\tau(\text{CH})$ (15) $\gamma(\text{CO})$ (6)                                                                                                           |
| 16 | -                                                                  | 839.92                | 10.57         | $\tau(\text{CC})$ (25) $\gamma(\text{CD})$ (30) $\tau(\text{CD})$ (13) $\gamma(\text{CN})$ (7)                                                                                    |
| 17 | -                                                                  | 836.17                | 4.17          | $\tau(\text{CC})$ (39) $\tau(\text{CD})$ (38) $\gamma(\text{CN})$ (8) $\gamma(\text{CD})$ (6)                                                                                     |
| 18 | -                                                                  | 815.60                | 11.36         | $\tau(\text{CD})$ (31) $\tau(\text{CC})$ (14) $\nu(\text{C}_{\text{alk}}\text{C}_{\text{alk}})$ (7) $\gamma(\text{CD})$ (5)                                                       |
| 19 | -                                                                  | 797.10                | 0.41          | $\tau(\text{CD})$ (82) $\tau(\text{CC})$ (18)                                                                                                                                     |
| 20 | -                                                                  | 782.32                | 11.25         | $\gamma(\text{CN})$ (12) $\tau(\text{CD})$ (15) $\tau(\text{CC})$ (9) $\gamma(\text{CD})$ (6) $\nu(\text{C}_{\text{alk}}\text{C}_{\text{alk}})$ (5)                               |
| 21 | -                                                                  | 775.65                | 3.85          | $\gamma(\text{CN})$ (17) $\tau(\text{CD})$ (27) $\tau(\text{CC})$ (12) $\nu(\text{C}_{\text{alk}}\text{C}_{\text{alk}})$ (10)                                                     |
| 22 | 770                                                                | 763.59                | 72.02         | $\tau(\text{CH})$ (74) $\gamma(\text{CO})$ (15) $\tau(\text{CC})$ (7)                                                                                                             |
| 23 | -                                                                  | 745.03                | 3.30          | $\tau(\text{CC})$ (51) $\gamma(\text{CO})$ (19) $\gamma(\text{CC}_{\text{alk}})$ (14) $\tau(\text{CH})$ (6)                                                                       |
| 24 | 649                                                                | 664.90                | 3.41          | $\alpha(\text{CC})$ (49) $\delta(\text{C=N})$ (8) $\tau(\text{CD})$ (12)                                                                                                          |
| 25 | -                                                                  | 655.47                | 0.84          | $\tau(\text{CD})$ (91)                                                                                                                                                            |
| 26 | -                                                                  | 645.31                | 6.19          | $\gamma(\text{CN})$ (23) $\tau(\text{CD})$ (35) $\tau(\text{CC})$ (17) $\delta(\text{C=N})$ (5)                                                                                   |
| 27 | -                                                                  | 606.93                | 0.10          | $\alpha(\text{CC})$ (78) $\gamma(\text{CD})$ (6)                                                                                                                                  |
| 28 | -                                                                  | 580.84                | 5.74          | $\alpha(\text{CC})$ (64) $\delta(\text{CC}_{\text{alk}})$ (7)                                                                                                                     |
| 29 | -                                                                  | 562.14                | 9.01          | $\tau(\text{CC})$ (61) $\gamma(\text{CO})$ (8)                                                                                                                                    |
| 30 | 550                                                                | 555.62                | 9.86          | $\tau(\text{CC})$ (50) $\gamma(\text{CO})$ (10)                                                                                                                                   |
| 31 | -                                                                  | 544.47                | 7.41          | $\alpha(\text{CC})$ (42) $\delta(\text{CO})$ (10) $\delta(\text{CC}_{\text{alk}})$ (10)                                                                                           |

|          |        |       |                                                                                                                                                                                                                           |
|----------|--------|-------|---------------------------------------------------------------------------------------------------------------------------------------------------------------------------------------------------------------------------|
| 32 491   | 496.87 | 7.01  | $\delta(\text{C-N})$ (16) $\delta(\text{CC}_{\text{alk}})$ (12) $\alpha(\text{CC})$ (16) $\delta(\text{C=N})$ (6) $\tau(\text{CC}_{\text{alk}})$ (5)                                                                      |
| 33 -     | 483.35 | 25.41 | $\tau(\text{CC})$ (29) $\gamma(\text{CC}_{\text{alk}})$ (16) $\gamma(\text{CO})$ (14) $\gamma(\text{CN})$ (6)                                                                                                             |
| 34 432   | 452.83 | 2.19  | $\delta(\text{CO})$ (57) $\alpha(\text{CC})$ (9) $\delta(\text{C=N})$ (8) $\gamma(\text{CN})$ (5)                                                                                                                         |
| 35       | 434.44 | 4.39  | $\tau(\text{CC})$ (43) $\gamma(\text{CN})$ (17) $\gamma(\text{CC}_{\text{alk}})$ (13) $\delta(\text{C-N})$ (6)                                                                                                            |
| 36 361   | 367.39 | 0.90  | $\tau(\text{CC})$ (87)                                                                                                                                                                                                    |
| 37 345   |        |       |                                                                                                                                                                                                                           |
| 38 314   | 338.77 | 0.88  | $\tau(\text{CC})$ (52) $\delta(\text{CC}_{\text{alk}})$ (7) $\gamma(\text{CO})$ (7) $\tau(\text{CH})$ (5)                                                                                                                 |
| 39 255   | 314.82 | 3.53  | $\tau(\text{CC=N})$ (26) $\delta(\text{C-N})$ (13) $\delta(\text{CC}_{\text{alk}})$ (9) $\gamma(\text{CC}_{\text{alk}})$ (7) $\tau(\text{N-C})$ (7) $\gamma(\text{OH})$ (7) $\tau(\text{CC})$ (6) $\gamma(\text{CO})$ (5) |
| 40 224   | 254.67 | 0.71  | $\tau(\text{CC})$ (38) $\alpha(\text{CC})$ (12) $\tau(\text{CC=N})$ (8) $\nu(\text{CarC}_{\text{alk}})$ (7)                                                                                                               |
| 41 202   | 218.33 | 1.26  | $\tau(\text{CC})$ (47) $\tau(\text{CC=N})$ (25) $\tau(\text{C=N})$ (7) $\tau(\text{N-C})$ (6) $\gamma(\text{CC}_{\text{alk}})$ (5)                                                                                        |
| 42 164   | 194.02 | 1.48  | $\tau(\text{CC})$ (27) $\delta(\text{CC}_{\text{alk}})$ (14) $\delta(\text{C=N})$ (10) $\tau(\text{CC}_{\text{alk}})$ (9) $\delta(\text{C-N})$ (8)                                                                        |
| 43 124sh | 143.25 | 0.28  | $\gamma(\text{OH})$ (23) $\tau(\text{C=N})$ (20) $\tau(\text{CC})$ (20) $\tau(\text{CC=N})$ (6) $\gamma(\text{CC}_{\text{alk}})$ (6) $\tau(\text{N-C})$ (5)                                                               |
| 44 90    | 74.05  | 0.02  | $\tau(\text{CC}_{\text{alk}})$ (31) $\delta(\text{C=N})$ (15) $\tau(\text{CC=N})$ (10) $\gamma(\text{CN})$ (10) $\delta(\text{C-N})$ (7) $\delta(\text{CC}_{\text{alk}})$ (6) $\tau(\text{CC})$ (5)                       |
| 45 51    | 54.44  | 0.78  | $\gamma(\text{CC}_{\text{alk}})$ (32) $\gamma(\text{CN})$ (15) $\tau(\text{C=N})$ (12) $\gamma(\text{OH})$ (11) $\gamma(\text{C=N})$ (9) $\tau(\text{N-C})$ (5)                                                           |
| 46 38    | 38.66  | 0.24  | $\tau(\text{N-C})$ (51) $\tau(\text{CC=N})$ (21) $\delta(\text{C-N})$ (10) $\tau(\text{CC}_{\text{alk}})$ (8)                                                                                                             |

---
